# Supplementary material for: Socioeconomic Determinants and Barriers to Accessing Newly Commissioned District Hospitals in Ghana’s Ashanti Region: An Accessibility Dimensions Perspective
Source: Research Square preprint supplement (doi:10.21203/rs.3.rs-7503566/v1), 2025-10-27
Supplement: Supplementary file 1 [file f77f337bbb744d702185f4eb.docx]

## **Questionnaire for Healthcare Seekers**

KWAME NKRUMAH UNIVERSITY OF SCIENCE AND TECHNOLOGY

COLLEGE OF ART AND BUILT ENVIRONMENT

DEPARTMENT OF PLANNING

We are undertaking research on an Assessment of a Newly Commissioned District Hospital in the Ashanti Region through an Accessibility Lens. I would be glad if you could respond appropriately to the questions below. The information you provide will solely be used for academic work and treated with the utmost confidentiality it deserves.

QUESTIONNAIRE FOR THE ASSESSMENT OF NEWLY COMMISSIONED DISTRICT HOSPITALS IN THE ASHANTI REGION THROUGH AN ACCESSIBILITY LENS

Dear respondent, I am conducting a study to gather your feedback on the accessibility of the newly commissioned district hospitals in the Ashanti Region. Your input is valuable in helping identify areas for improvement and ensuring that the hospitals are accessible to all. Participation is voluntary and any information shared will be treated conﬁdentially. Thank you for participating in this survey.

1. Select your District


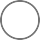
 Ahafo Ano North
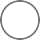
 Asante Akim Central
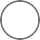
 Bekwai

**PART I: Background of Respondent**

1. Name of Community where the respondent resides……………………………………………………………..
2. What is the nature of the Community you stay


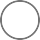
 Urban


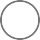
 Peri-urban


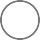
 Rural

1. Sex of Respondent


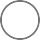
 Male
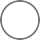
 Female

1. Age of respondents (in years)


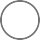
 Less than 20yrs
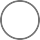
 20-29yrs


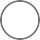
 30-39yrs
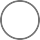
40-49yrs
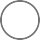
50-59yrs
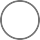
 60+ yrs

1. Is the newly commissioned District Hospital located in the community where you live?


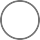
 Yes
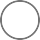
 No

1. How long have you been living in this community of the newly commissioned district hospital?


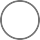
 Less than a year
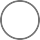
 1-5 years


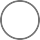
 6-10 years


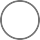
 More than 10 years

1. Respondent's Educational Level


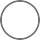
 No formal education
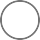
 Primary


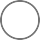
 Junior High
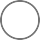
 Senior High
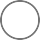
 Tertiary

1. Employment Status


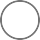
 Employed
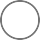
 Unemployed

1. What is your estimated annual household income?


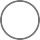
 Less than GH₵5,000
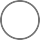
 GH₵5,100 - GH₵10,000


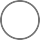

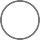
 GH₵10,001 - GH₵20,000
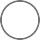
 GH₵20,001 - GH₵30,000

More than GH₵30,000

1. When was your last visit to the newly commissioned district hospital for your healthcare needs?


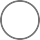
 Less than one month


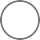
 2 – 3 months ago


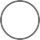
 4 to 6 months ago


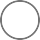
 7 months ago


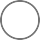
 Never visited the new District hospital before

1. If never, state the reason why you never visit the new district hospital


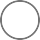
 Expensive Service Charge
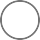
 Far from my home


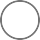
The location of the hospital doesn't favor me


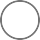
 I am not satisﬁed with the services provided


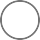
 Health workers are not welcoming

1. What was your mode of payment for the services?


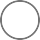
 Out of pocket


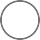
 NHIS

**PART II: Accessibility of Newly Commissioned District Hospitals in the Ashanti Region**

**ACCESSIBILITY (Transportation and Geographic Factors):**

1. How do you usually travel to the new district hospital?


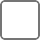
 Walking


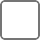
 Motor Bicycle


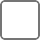
 Public transportation
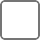
 Private vehicle


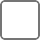
 Other (please specify)

If others, Specify.....

1. How long does it typically take for you to reach the district hospital from your home?


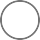
 Less than 15 minutes
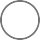
 15-30 minutes


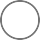
 31-45 minutes


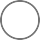
 46-60 minutes


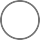
 More than 60 minutes

16. On a scale of 1 to 5, how would you rate the ease of ﬁnding transport to the newly commissioned district hospital?


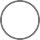
 1. Very Diﬃcult


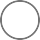
 2. Diﬃcult


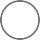
 3. Neutral


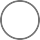
 4. Easy


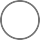
 5. Very easy

17. Health seekers from this community have challenges going to the new district hospital


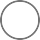
 1.Strongly Disagree
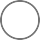
 2.Disagree


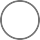
 3.Neutral
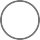
 4.Agree
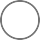
 5.Strongly Agree

**Using the Likert scale on agreement on the following statements ( • Strongly Agree • Agree • Undecided • Disagree • Strongly Disagree)**

18. Parking facilities near the hospital are adequate


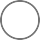
 Strongly disagree
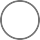
 Disagree
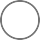
 Neutral
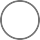
Agree
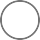
Strongly Agree

19. I ﬁnd it easy to navigate to the hospital from the community


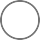
 Strongly disagree
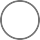
 Disagree
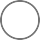
 Neutral
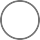
Agree
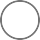
Strongly Agree

20. The hospital's location poses a signiﬁcant barrier for me to reach it


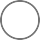
 Strongly disagree
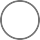
 Disagree
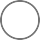
 Neutral
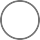
Agree
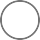
Strongly Agree

21. The hospital's location is convenient for me and my household


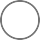
 Strongly disagree
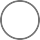
 Disagree
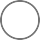
 Neutral
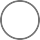
Agree
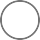
Strongly Agree

22. The hospital is situated in a safe and accessible neighborhood.


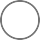
 Strongly disagree
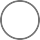
 Disagree
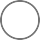
 Neutral
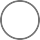
Agree
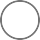
Strongly Agree

**Transportation-related Challenges**

Select your options

23. Public transportation options to the hospital are readily available.


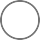
 Strongly disagree
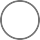
 Disagree
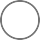
 Neutral
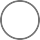
Agree
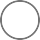
Strongly Agree

24. The hospital's location makes it diﬃcult for me to arrange transportation in case of an emergency.


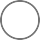
 Strongly disagree
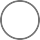
 Disagree
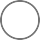
 Neutral
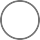
Agree
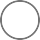
Strongly Agree

25. The hospital is easily accessible by private transportation (car, bike, etc.).


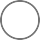
 Strongly disagree  Disagree  Neutral Agree Strongly Agree

26. I face challenges in ﬁnding reliable transportation to reach the hospital.

Strongly disagree  Disagree  Neutral Agree Strongly Agree

27. The cost of transportation to the hospital is a concern for me.

Strongly disagree  Disagree  Neutral Agree Strongly Agree

**Overall Accessibility**

Select your option

28. I feel conﬁdent about reaching the hospital on time.

Strongly disagree  Disagree  Neutral Agree Strongly Agree

29. I am satisﬁed with the overall physical accessibility of the hospital.

Strongly disagree  Disagree  Neutral Agree Strongly Agree

30. The availability of transportation signiﬁcantly impacts my ability to access the hospital.

Strongly disagree  Disagree  Neutral Agree Strongly Agree

31. The hospital's location is a factor that inﬂuences my choice of healthcare facilities

Strongly disagree  Disagree  Neutral Agree Strongly Agree

32. The travel time to reach the hospital is reasonable and manageable.

Strongly disagree  Disagree  Neutral Agree Strongly Agree

**Accessibility Dimension: (Availability Access)**

Select your option

33. The hospital's operating hours are convenient for my healthcare needs.

Strongly disagree  Disagree  Neutral Agree Strongly Agree

34. The hospital has enough healthcare professionals to meet the district population's healthcare needs.

Strongly disagree  Disagree  Neutral Agree Strongly Agree

35. The hospital provides clear signage and directions for easy navigation.

Strongly disagree  Disagree  Neutral Agree Strongly Agree

36. The new district hospital maintains an adequate supply of medications and medical supplies.

Strongly disagree  Disagree  Neutral Agree Strongly Agree

37. I feel that the physical layout of the hospital facilitates easy access to diﬀerent wards and units.

Strongly disagree  Disagree  Neutral Agree Strongly Agree

38. There is suﬃcient space and capacity to accommodate the number of patients seeking care.

Strongly disagree  Disagree  Neutral Agree Strongly Agree

39. The hospital provides clear information about emergency access points.

Strongly disagree  Disagree  Neutral Agree Strongly Agree

40. The hospital's location is safe and secure for healthcare seekers and visitors.

Strongly disagree  Disagree  Neutral Agree Strongly Agree

41. I am satisﬁed with the overall availability of the hospital.

Strongly disagree  Disagree  Neutral Agree Strongly Agree

42. The hospital's services are available when needed, without signiﬁcant delays.

Strongly disagree  Disagree  Neutral Agree Strongly Agree

43. The new district hospital provides timely access to diagnostic tests and procedures.

Strongly disagree  Disagree  Neutral Agree Strongly Agree

44. The new district hospital oﬀers a comprehensive range of healthcare services

Strongly disagree  Disagree  Neutral Agree Strongly Agree

45. The hospital's physical infrastructure is well-maintained and conducive to providing healthcare services.

Strongly disagree  Disagree  Neutral Agree Strongly Agree

46. Essential medical equipment and technology are consistently available at the hospital.

Strongly disagree  Disagree  Neutral Agree Strongly Agree

47. I am conﬁdent in the availability of emergency transportation services to the hospital.

Strongly disagree  Disagree  Neutral Agree Strongly Agree

48. The hospital's location is accessible to all members of the community

Strongly disagree  Disagree  Neutral Agree Strongly Agree

49. Emergency services at the hospital are promptly accessible.

Strongly disagree  Disagree  Neutral Agree Strongly Agree

50. The waiting times for appointments or emergency services are reasonable.

Strongly disagree  Disagree  Neutral Agree Strongly Agree

**Accessibility Dimension: (Accommodation Access)**

Select your option

51. The hospital staﬀ are helpful when attending to healthcare seekers.

Strongly disagree  Disagree  Neutral Agree Strongly Agree

52. The hospital staﬀ is approachable and willing to address the concerns and questions of healthcare seekers.

Strongly disagree  Disagree  Neutral Agree Strongly Agree

53. I am satisﬁed with the overall accommodation experience at the hospital.

Strongly disagreeAgree  Strongly Agree  Undecided  Disagree

54. The hospital provides clear and understandable information about the services oﬀered

Strongly disagree  Disagree  Neutral Agree Strongly Agree

55. The hospital staﬀ communicates clearly about appointment delays or changes.

Strongly disagree  Disagree  Neutral Agree Strongly Agree

56. The hospital actively seeks feedback to improve accommodation for patients and visitors.

Strongly disagree  Disagree  Neutral Agree Strongly Agree

57. The hospital communicates eﬀectively about any changes in policies or procedures.

Strongly disagree  Disagree  Neutral Agree Strongly Agree

**Facilities for Special Needs:**

Select your options

58. The hospital has appropriate facilities for individuals with special needs or disabilities.

Strongly disagree  Disagree  Neutral Agree Strongly Agree

59. I am satisﬁed with the level of assistance provided to individuals with mobility challenges.

Strongly disagree  Disagree  Neutral Agree Strongly Agree

60. The hospital takes measures to ensure privacy and conﬁdentiality during consultations.

Strongly disagree  Disagree  Neutral Agree Strongly Agree

Cultural and Societal Factors

Select your options

61. Cultural or societal factors inﬂuence your decision or reluctance to seek healthcare services at the district hospital?

Strongly disagree  Disagree  Neutral Agree Strongly Agree

62. Cultural beliefs and practices in the community impact accessibility to the district hospital?

Strongly disagree  Disagree  Neutral Agree Strongly Agree

**Acceptability Dimension**

Select your Options

63. The hospital staﬀ treat healthcare seekers with respect and dignity.

Strongly disagree  Disagree  Neutral Agree Strongly Agree

64. The hospital's cultural competence is evident in its approach to healthcare seekers.

Strongly disagree  Disagree  Neutral Agree Strongly Agree

65. I feel comfortable discussing my healthcare concerns with the hospital staﬀ.

Strongly disagree  Disagree  Neutral Agree Strongly Agree

66. The quality of healthcare services at the district hospital meets my expectations

Strongly disagree  Disagree  Neutral Agree Strongly Agree

67. The hospital's policies and practices align with cultural and personal values.

Strongly disagree  Disagree  Neutral Agree Strongly Agree

**Communication and Informed Consent**

Select your Option

68. The hospital actively addresses concerns and complaints raised by healthcare seekers in my community

Strongly disagree  Disagree  Neutral Agree Strongly Agree

69. The hospital actively seeks healthcare seekers' feedback and incorporates it into its practices.

Strongly disagree  Disagree  Neutral Agree Strongly Agree

70. I am satisﬁed with the overall acceptability of healthcare services at the new district hospital.

Strongly disagree  Disagree  Neutral Agree Strongly Agree

71. The hospital should continue eﬀorts to enhance the acceptability of its services for the larger community.

Strongly disagree  Disagree  Neutral Agree Strongly Agree

72. The hospital maintains high standards of privacy during medical examinations and consultations.

Strongly disagree  Disagree  Neutral Agree Strongly Agree

73. I receive clear and understandable information about my diagnosis and treatment options.

Strongly disagree  Disagree  Neutral Agree Strongly Agree

74. I trust that my personal health information is kept conﬁdential by the hospital.

Strongly disagree  Disagree  Neutral Agree Strongly Agree

75. The hospital ensures that healthcare seekers are well-informed before making healthcare decisions

Strongly disagree  Disagree  Neutral Agree Strongly Agree

76. What sources of information do you hear about the newly commissioned district hospital operationalization? (Select all that apply)

Local newspapers  Radio

Television

Community Information Center  Community meetings

Church announcements  Mosque announcements  Market storm

Social media  Word of mouth

Health workers announce others

If others, Specify....

77. How informed do you feel about the healthcare services oﬀered at the newly commissioned district hospital in your district?

Very uninformed

Somewhat uninformed

Neutral

Somewhat informed

Very informed

**The cost of healthcare services at the new district hospital is reasonable (Affordability Dimension)**

Select your options

78. Do you actively consider your ﬁnancial situation before deciding to seek healthcare services at the district hospital?

Strongly disagree  Disagree  Neutral Agree Strongly Agree

79. You have health insurance coverage that helps alleviate the ﬁnancial burden of healthcare services at the district hospital?

Strongly disagree  Disagree  Neutral Agree Strongly Agree

80. I believe the district hospital should implement measures to make healthcare services more aﬀordable for the community.

Strongly disagree  Disagree  Neutral Agree Strongly Agree

81. Not having health insurance has been a barrier to accessing healthcare services at the district hospital.

Strongly disagree  Disagree  Neutral Agree Strongly Agree

82. You experienced ﬁnancial diﬃculties in paying for healthcare services at the new district hospital?

Strongly disagree  Disagree  Neutral Agree Strongly Agree

83. The cost of healthcare services at the new district hospital is reasonable.

Strongly disagree  Disagree  Neutral Agree Strongly Agree

84. Financial concerns deterred you from seeking healthcare services at the district hospital in the past?

Strongly disagree  Disagree  Neutral Agree Strongly Agree

85. How would you describe the cost of seeking healthcare services at the new district hospital?

Very unaﬀordable

Somewhat unaﬀordable

Neutral

Somewhat aﬀordable  Very affordable

86. Have ﬁnancial constraints ever deterred you and your household members from seeking healthcare services at the new district hospital?

To a Great Extent  Somewhat

Neutral

Very Little  Not at All

*End of the questionnaire. Thank you for your participation*
